# Supplementary material
Source: PubMed Central journal article supplement (PMC1483055)
Supplement: mbc_E05-08-0738_1.pdf [file mbc_E05-08-0738_1.pdf]

## SUPPLEMENTARY MATERIALS

**Supplementary Table 1.** Primers used in this study

| Name | Nucleotide sequence*                                                               |
|------|------------------------------------------------------------------------------------|
| GS2  | CAATAACGACATTGTGCGGGTATGTATGCTACGGATGATTAATGAATGTAGA<br><u>CCTGCAGGCATGCAAGCT</u>  |
| GS3  | GTTCCGGTATGATGTCATACAAATCCTTTCAACAAAAGATGCTTCAAGATTAC<br><u>CGAGCTCGAATTC</u> ACTG |
| GS6  | TGTCTCCAACCTCTTTGAGG                                                               |
| GS7  | <u>TGTCctcgaggggtaccAGCGACGGCCAAAGAGGCAATG</u>                                     |
| GS8  | CAAGGTAGTGTAAGCGTCAT                                                               |
| GS9  | <u>CGCTggtaccctcgagGACACCAGCGCCGCGAAAC</u>                                         |
| GS22 | GAGCGCAACGCAATTAATGT                                                               |
| GS23 | TTTTGGGAGTCACGACGTTG                                                               |
| GS24 | CAGCTATGACCATGATTA                                                                 |
| GS25 | <u>AGAATTTTCATcggccgTATTGTTTTTTGAGACTTTC</u>                                       |
| GS26 | CAAATAAATTTAAGGGTA                                                                 |
| GS27 | <u>AAAAACAATAcggccgATGAAATTCTC</u> CACTGCT                                         |
| GS29 | <u>AGAATTGCATTcggccgcTTTTTTCTT</u> GTTAGTGTG                                       |
| GS31 | <u>AAGAAAAAAgcggccgcAATGCAATTCT</u> CTACTGTC                                       |
| GS32 | TTTGCTGTAAGGGTGAAT                                                                 |
| GS33 | <u>AAACGGACATcggccgTTTATTTTATTT</u> AGCAGAG                                        |
| GS34 | AGGGTAAGTTTTCCGTATGT                                                               |
| GS35 | <u>ATAAAATAAAcggccgATGTCCGTTT</u> CCAAGATT                                         |

GS52 TGAGGCCTCGTGGCGCAC

GS53 GGCg gatccTTGGATATGGGGGAATTCCG

GS56 GACCATGATTACGCCAAGC

GS57 TCCTCTAGAGTCGACCTGC

LS137 ACAA ACTTATTAATACTACGAAAGTCTCAAAAAACAATACCGGATCCCCGGTT  
AATTAA

LS138 TATTGAAGGAAATAAAACATGCAGGTTTTGTTCTCGTACGAATTCGAGCTCG  
TTTAAAC

LS139 GTCGCTTGCCAATGCGCTATG

LS144 GCGTTTCCCTGCTCGCAGGTC

IC101 TGCCATGAGTAGCAGCAGTCTGAAGGGGTTACCAAACGTTACCGGATCCCCG  
GGTTAATTA

IC102 TTGATTCGTGCTTATAAAACCTTAGAGGCATCTATTTACAGAATTCGAGCTCG  
TTTAAAC

IC103 TGGTTAATTCACCTACTGGCTACTA

ML176 CATATAGACCCAAATAAAAACCAAAGAACCACATATAGAACGGATCCCCGGG  
TTAATTAA

ML177 AAAGAGGGAATGACGAGAAATTAGCTGAAAAATACTGGCAGAATTCGAGCTC  
GTTTAAAC

ML178 CGACACGGCTTTTAGAGAGGAAAGTA

5'TTEFCHK TATTTTTTTTTCGCCTCGACATCATCTGCCC

---

\*Underlining indicates sequences hybridizing to vector templates or, for two-step PCR reactions, regions of step-1 PCR products that hybridize to each other. Lower case indicates restriction sites included in the primers.
